# Supplementary material
Source: publisher figshare collection journal article supplement (https://acs.figshare.com/ndownloader/files/13448537)
Supplement: Supplementary file 1 [file 13448537]

## Supporting Information

Lanthanum-doped chitosan hydrogels promote the apoptosis of melanoma cells by Bcl-2/Bax pathway

*Jia-Wei Lu,<sup>†1</sup> Yu Miao,<sup>†2</sup> Cui-Xiang Guo,<sup>1</sup> Qin-Fei Ke,<sup>1</sup> Jun-Hui Yin,<sup>\*3</sup> Shu-Min Zhou,<sup>\*3</sup> Ya-Ping Guo<sup>\*1</sup>*

<sup>1</sup> The Education Ministry Key Lab of Resource Chemistry and Shanghai Key Laboratory of Rare Earth Functional Materials, Shanghai Normal University, Shanghai 200234, China.

<sup>2</sup> Department of Orthopedic Surgery, Shanghai Jiao Tong University Affiliated Sixth People's Hospital, Shanghai 200233, China.

<sup>3</sup> Institution of microsurgery for Limbs, Department of Orthopedic Surgery, Shanghai Jiao Tong University Affiliated Sixth People's Hospital, Shanghai 200233, China.

\* E-mail: ypguo@shnu.edu.cn (Ya-Ping Guo); zhoushumin\_zw@126.com (Shu-Min Zhou); yingjunhui1429@126.com (Jun-Hui Yin)

† These authors contributed equally.

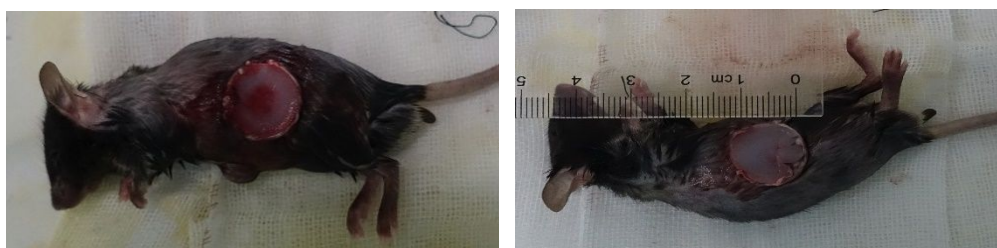

**Figure S1.** Optical images of the wounds after *in vivo* implantation of La-CS hydrogels (left) and CS hydrogels (right).
